# Supplementary material
Source: HighWire-hosted journal article supplement (https://cmaj.ca/highwire/filestream/77579/field_highwire_adjunct_files/3/200645-res-4-at.pdf)
Supplement: 200645-res-4-at.pdf [file 200645-res-4-at.pdf]

#### **Appendix 4 (as supplied by the authors): Characteristics of included studies**

Table 1: Characteristics of included studies for COVID-19 with ARDS

Table 2: Characteristics of included randomized controlled trials for ARDS

Table 3 Characteristics of included studies for COVID-19

Table 4: Characteristics of included studies for SARS

Table 5: Characteristics of included studies for MERS

Table 6: Characteristics of included studies for influenza

Table 7: Characteristics of included randomized controlled trials for CAP

**Table 1 Characteristics of included studies for COVID-19 with ARDS**

| <b>Study</b> | <b>Country, region and hospital</b> | <b>Study design</b>        | <b>Population</b>                                                     | <b>Intervention</b>                             | <b>Adjustment</b>       | <b>Outcomes</b> |
|--------------|-------------------------------------|----------------------------|-----------------------------------------------------------------------|-------------------------------------------------|-------------------------|-----------------|
| Wu 2020      | Jinyintan Hospital, Wuhan, China    | Retrospective cohort study | Patients with COVID-19 pneumonia with ARDS: according to WHO criteria | Methylprednisolone (n=50)<br>No steroids (n=34) | Cox regression analysis | Mortality       |

ARDS=acute respiratory distress syndrome; WHO=World Health Organization.

**Table 2 Characteristics of included randomized controlled trials for ARDS**

| Study/year<br>(country)<br>(reference) | Setting/<br>inclusion criteria                                                                                                                                                                                                                                            | Patient<br>characteristics                     | Disease<br>severity<br>scores                                   | CS<br>Group<br>N | Non-<br>CS<br>group<br>N | Corticosteroid therapy dose<br>/timing/duration                                                                                                                                                                                                                                                 | Outcomes reported                                                                                                                                                |
|----------------------------------------|---------------------------------------------------------------------------------------------------------------------------------------------------------------------------------------------------------------------------------------------------------------------------|------------------------------------------------|-----------------------------------------------------------------|------------------|--------------------------|-------------------------------------------------------------------------------------------------------------------------------------------------------------------------------------------------------------------------------------------------------------------------------------------------|------------------------------------------------------------------------------------------------------------------------------------------------------------------|
| Steinberg, 2006<br>(USA)               | 25 hospitals of the National Heart, Lung, and Blood Institute (NHLBI) ARDS Clinical Trials Network<br><br>Intubated and receiving mechanical ventilation; 7 to 28 days after onset of ARDS; on day of study entry PaO <sub>2</sub> /FiO <sub>2</sub> had to be < 200 mmHg | Persistent Acute Respiratory Distress Syndrome | APACHE III score mean 87.6 sd 27.5<br>placebo mean 84.6 sd 29.4 | 89               | 91                       | Methylprednisolone sodium succinate diluted in 50 mL of 5% dextrose in water; single IV dose of 2 mg/kg of PBW; followed by 0.5 mg/kg of PBW every 6 hours for 14 days; then dose of 0.5 mg/kg of PBW every 12 hours for 7 days, then tapering of dose                                          | Mortality<br>Length of ICU<br>Length of hospital stay<br>Duration of mechanical ventilation<br>Neuromuscular weakness<br>Superinfection                          |
| Meduri, 2007<br>(USA)                  | 5 ICUs<br><br>Adult intubated patients receiving mechanical ventilation; meeting criteria for ARDS according to AECC (Bernard 1994) within 72 hours                                                                                                                       | Early ARDS                                     | APACHE III score mean 60.2 sd 20.2<br>placebo mean 57.9 sd 21.0 | 63               | 28                       | Methylprednisolone; mixed in 240 mL of normal saline and administered daily as an infusion at 10 mL/hour; loading dose of 1 mg/kg, followed by infusion of 1 mg/kg/day from day 1 to day 14; 0.5 mg/kg/day on days 15 to day 21; 0.25 mg/kg/day on days 22 to day 25; then 0.125 mg/kg/day from | Mortality<br>Length of ICU<br>Length of hospital stay<br>Duration of mechanical ventilation<br>Serious hyperglycemia<br>Neuromuscular weakness<br>Superinfection |

|                           |                                                                                                                                                                                                                                                                                                               |                                                                       |                                                        |    |    |                                                                                                                                                                                                                                                                                               |                                                                                                         |
|---------------------------|---------------------------------------------------------------------------------------------------------------------------------------------------------------------------------------------------------------------------------------------------------------------------------------------------------------|-----------------------------------------------------------------------|--------------------------------------------------------|----|----|-----------------------------------------------------------------------------------------------------------------------------------------------------------------------------------------------------------------------------------------------------------------------------------------------|---------------------------------------------------------------------------------------------------------|
| Liu,<br>2012<br>(China)   | ICU of Zhongda Hospital Affiliated to Southeast University<br><br>Adults from 18 to 80 years of age; fulfils criteria of ARDS according to the AECC (Bernard 1994); ARDS diagnosis within 3 days of admission; fulfils CIRCI diagnosis according to Society of Critical Care Medicine of PLAs Guidelines 2006 | Early ARDS plus critical illness related corticosteroid insufficiency | APACHE II score mean 20.7 (sd 6.4) mean 21.4 (sd 7.16) | 12 | 14 | Stress dose glucocorticoid; hydrocortisone 100 mg IV 3 times a day for 7 days                                                                                                                                                                                                                 | Mortality<br>Length of ICU                                                                              |
| Rezk,<br>2013<br>(Kuwait) | ICU of Farwaneya Hospital Kuwait<br><br>Patients diagnosed with ARDS; mechanically ventilated; start of treatment in first 48 hours                                                                                                                                                                           | Early ARDS                                                            | NR                                                     | 18 | 9  | Methylprednisolone mixed in 240 mL normal saline; administered daily at infusion of 10 mL/hour; loading dose of 1 mg/kg followed by infusion of 1 mg/kg/day on days 1 to 14, 0.5 mg/kg/day from day 15 to day 21, 0.25 mg/kg/day from day 22 to day 25, 0.125 mg/kg/day from day 26 to day 28 | Mortality<br>Duration of mechanical ventilation                                                         |
| Zhao,<br>2014<br>(China)  | ICU of Songjiang hospital of shanghai<br><br>Criteria of ARDS according to AECC (Bernard 1994)                                                                                                                                                                                                                | ARDS                                                                  | NR                                                     | 24 | 29 | Budesonide plus conventional treatment; inhaled budesonide 2 mg twice a day for 12 days alongside ARDS management algorithm according                                                                                                                                                         | Mortality<br>Length of hospital stay<br>Duration of mechanical ventilation<br>Gastrointestinal bleeding |

to the 2006 Chinese Society for  
Critical Care Medicine Guidelines

Superinfection

|                                |                                                                                                                                                                                                                                                                                                                                                           |                                 |                                                                                   |     |     |                                                                                                                                                                                                                                                                                                                                                                                                |                                                                                                                            |
|--------------------------------|-----------------------------------------------------------------------------------------------------------------------------------------------------------------------------------------------------------------------------------------------------------------------------------------------------------------------------------------------------------|---------------------------------|-----------------------------------------------------------------------------------|-----|-----|------------------------------------------------------------------------------------------------------------------------------------------------------------------------------------------------------------------------------------------------------------------------------------------------------------------------------------------------------------------------------------------------|----------------------------------------------------------------------------------------------------------------------------|
| Tongyoo,<br>2016<br>(Thailand) | ICU of Siriraj Hospital, Bangkok<br><br>Adults > 18 years of age; with severe sepsis or septic shock; receiving mechanical ventilation for hypoxaemic respiratory failure; within 12 hours of study entry; meeting the diagnostic criteria for ALI/ARDS according to the AECC definition (Bernard 1994)                                                   | Early sepsis<br>associated ARDS | APACHE II score<br>mean 21.7, sd 5.7;<br>placebo mean 21.9,<br>sd5.7              | 98  | 99  | Hydrocortisone; IV bolus, 50 mg<br>in 10 mL of normal saline, every 6<br>hours for 7 days                                                                                                                                                                                                                                                                                                      | Mortality<br>Duration of mechanical<br>ventilation<br>Serious hyperglycemia<br>Gastrointestinal bleeding<br>Superinfection |
| Villar,<br>2020<br>(Spain)     | 17 ICUs<br><br>Eligible patients were aged<br>18 years or older; intubated and mechanically<br>ventilated;<br>had acute onset of ARDS, as defined by the<br>American-<br>European Consensus Conference criteria for<br>ARDS,11 or<br>by the Berlin criteria as moderate-to-severe<br>ARDS,12<br>which includes having an initiating clinical<br>condition | Moderate-to-<br>severe ARDS     | Moderate (100<br><PaO2/FiO2 ≤200)<br>239/277<br>Severe (PaO2/FiO2<br>≤100) 38/277 | 139 | 138 | Dexamethasone plus conventional<br>treatment; Patients in the<br>dexamethasone group received an<br>intravenous dose of 20 mg once<br>daily from day 1 to day 5, which<br>was reduced to 10 mg once daily<br>from day 6 to day 10.Treatment<br>with dexamethasone was<br>maintained<br>for a maximum of 10 days after<br>randomisation or<br>until extubation (if occurring<br>before day 10). | Mortality<br>Duration of mechanical<br>ventilation<br>Serious hyperglycemia<br>Superinfection                              |

(eg, pneumonia, aspiration, inhalation injury, sepsis, trauma, or acute pancreatitis) within 1 week of the known clinical insult, or new or worsening respiratory symptoms; bilateral pulmonary infiltrates on chest imaging (x-ray or CT scan); absence of left atrial hypertension, pulmonary capillary wedge pressure of less than 18 mm Hg, or no clinical signs of left heart failure; and hypoxaemia, as defined by a ratio between partial pressure of oxygen in arterial blood and fraction of inspired oxygen (PaO<sub>2</sub>/FiO<sub>2</sub>) of 200 mm Hg or less on positive end-expiratory pressure (PEEP) of 5 cm H<sub>2</sub>O or more, regardless of FiO<sub>2</sub>.

---

ALI=Acute lung injury; ARDS=Acute Respiratory Distress Syndrome; PBW=Predicted Body Weight; ICU=Intensive care unit; IV=Intravenous; AECC=American-European Consensus Conference; CS=Corticosteroid; CIRCI=critical illness-related corticosteroid insufficiency.

**Table 3 Characteristics of included studies for COVID-19**

| <b>Study</b>      | <b>Country, region and hospital</b>                                                 | <b>Study design</b>        | <b>Population</b>                                                                                     | <b>Intervention</b>                  | <b>Adjustment</b>                              | <b>Outcomes</b>                                           |
|-------------------|-------------------------------------------------------------------------------------|----------------------------|-------------------------------------------------------------------------------------------------------|--------------------------------------|------------------------------------------------|-----------------------------------------------------------|
| Li 2020 (n=269)   | Tongji Hospital, Wuhan, China                                                       | Retrospective cohort study | Severe COVID-19 patients. Diagnosed based on the WHO interim guidance and Chinese COVID-19 guideline. | Steroid (n=196)<br>No steroid (n=73) | Multivariable proportional regression analysis | Cox hazards Mortality                                     |
| Lu 2020 (n=62)    | Tongji hospital, Wuhan, China                                                       | Retrospective cohort study | ICU patients with confirmed SARS-CoV-2 infection                                                      | Steroid (n=31)<br>No steroid (n=31)  | Propensity score matching analysis             | Mortality                                                 |
| Wang 2020 (n=115) | Third People's Hospital of Hubei, China                                             | Retrospective cohort study | Patients with confirmed SARS-CoV-2 infection (mixed severity)                                         | Steroid (n=73)<br>No steroid (n=42)  | Multivariable regression analysis              | logistic Mortality or intensive care unit (ICU) admission |
| Xu 2020 (n=113)   | First Affiliated Hospital of Zhejiang University, Shenzhen Third People's Hospital, | Retrospective cohort study | Patients with confirmed SARS-CoV-2 infection (mixed severity)                                         | Steroid (n=64)<br>No steroid (n=49)  | Multivariable regression analysis              | logistic Duration of SARS-CoV-2 Virus RNA detection       |

|                     |                                                    |                               |                                                                             |                                     |                                                  |  |                          |
|---------------------|----------------------------------------------------|-------------------------------|-----------------------------------------------------------------------------|-------------------------------------|--------------------------------------------------|--|--------------------------|
|                     | China                                              |                               |                                                                             |                                     |                                                  |  |                          |
| Yan 2020<br>(n=120) | NO.3<br>People's<br>hospital of<br>Hubei,<br>China | Retrospective<br>cohort study | Patients with laboratory-confirmed SARS-CoV-2 infection<br>(mixed severity) | Steroid (n=54)<br>No steroid (n=66) | Multivariable<br>logistic<br>regression analysis |  | Prolonged viral shedding |

ARDS=acute respiratory distress syndrome; WHO=World Health Organization.



**Table 4 Characteristics of included studies for SARS**

| <b>Study</b>          | <b>Country, region and hospital</b> | <b>Study design</b>         | <b>Population</b>                                                                                                                                                                                                                                                                                                                                                                                                                                                                                                                                                                                                                                                        | <b>Intervention</b>                                                                                      | <b>Adjustment</b>                          | <b>Outcomes</b>                                                                                                                             |
|-----------------------|-------------------------------------|-----------------------------|--------------------------------------------------------------------------------------------------------------------------------------------------------------------------------------------------------------------------------------------------------------------------------------------------------------------------------------------------------------------------------------------------------------------------------------------------------------------------------------------------------------------------------------------------------------------------------------------------------------------------------------------------------------------------|----------------------------------------------------------------------------------------------------------|--------------------------------------------|---------------------------------------------------------------------------------------------------------------------------------------------|
| Lau 2009<br>(n=1743)  | Hong Kong                           | Retrospective cohort study  | Probable SARS patients: according to the WHO criteria.                                                                                                                                                                                                                                                                                                                                                                                                                                                                                                                                                                                                                   | Steroid (n=51)<br>No steroid (n=751)<br>Without ribavirin                                                | Multinomial regression                     | logistic Case fatality                                                                                                                      |
| Lee 2004<br>(n=17)    | Two regional hospitals in Hong Kong | Randomized controlled trial | Probable SARS, with or without laboratory confirmation according to the CDC criteria                                                                                                                                                                                                                                                                                                                                                                                                                                                                                                                                                                                     | Early (<7 days of illness) intravenous hydrocortisone 100 mg every 8 hourly (n=9)<br>Normal saline (n=7) | NA                                         | Median time for SARS-CoV RNA to become undetectable in plasma<br>Plasma SARS-CoV RNA concentrations in the second and third week of illness |
| Long 2016<br>(n=5327) | Mainland China                      | Retrospective cohort study  | Clinically diagnosed SARS: according to the CDC criteria. Case definitions were as follows: 1) fever (temperature >38 °C); 2) chest radiograph showed evidence of consolidation with or without respiratory symptoms; 3) history of exposure to an index case suspected of having SARS or direct contact with a person who fell ill following exposure to the index case.<br>Severe SARS cases: according to the criteria of Health Ministry of China, with one of the following: 1) breathing of more than 30/min; 2) oxygen partial pressure of more than 70 mmHg; 3) blood oxygen saturation of less than 93%; 4) sternum score of greater than or equal to 2 points. | Steroid (n=NR)<br>No steroid (n=NR)                                                                      | Multivariate proportional regression model | Cox's hazard Mortality                                                                                                                      |

SARS=severe acute respiratory syndrome; WHO=World Health Organization; CoV=coronavirus; NA=not applicable; CDC=Center for Disease Control and Prevention; RNA=Ribonucleic Acid; NR=not

---

reported.

**Table 5 Characteristics of included studies for MERS**

| <b>Study</b>         | <b>Country, region and hospital</b>                  | <b>Study design</b>        | <b>Population</b>                                                                                                     | <b>Intervention</b>                   | <b>Adjustment</b>                                                                                         | <b>Outcomes</b>                                                                        |
|----------------------|------------------------------------------------------|----------------------------|-----------------------------------------------------------------------------------------------------------------------|---------------------------------------|-----------------------------------------------------------------------------------------------------------|----------------------------------------------------------------------------------------|
| Alfaraj 2019 (n=314) | Prince Mohammed bin Abdulaziz Hospital, Saudi Arabia | Retrospective cohort study | Symptomatic MERS-CoV confirmed patients. All infections were confirmed using real time RT-PCR of respiratory samples. | Steroid (n=NR)<br>No steroid (n=NR)   | Logistic regression analysis                                                                              | Mortality                                                                              |
| Arabi 2018 (n=309)   | Fourteen Saudi Arabian tertiary care hospitals       | Retrospective cohort study | ICU patients with MERS                                                                                                | Steroid (n=151)<br>No steroid (n=158) | Multivariable logistic regression analysis<br>Cox proportional hazards model<br>Marginal structural model | 90-day all cause mortality<br>MERS-CoV RNA Clearance<br>Time to MERS-CoV RNA clearance |

MERS-CoV=middle east respiratory syndrome coronavirus; RT-PCR=reverse transcriptase polymerase chain reaction; NR=not reported; ICU=intensive care unit; RNA=Ribonucleic Acid.

**Table 6 Characteristics of included studies for influenza**

| Study                         | Country, region and hospital | Study design                                                        | Population                                                                                                                                           | Intervention                         |            | Adjustment                                   | Outcomes                                               |
|-------------------------------|------------------------------|---------------------------------------------------------------------|------------------------------------------------------------------------------------------------------------------------------------------------------|--------------------------------------|------------|----------------------------------------------|--------------------------------------------------------|
|                               |                              |                                                                     |                                                                                                                                                      | Steroid                              | No steroid |                                              |                                                        |
| Al-Busaidi 2016 (n=68)        | Oman                         | Single centre, retrospective cohort                                 | In-hospital patients<br>Median age (years): 23 (range 25 days to 67 years)                                                                           | 11                                   | 57         | Multivariable regression analysis            | Length of stay                                         |
| Balaganesakumar 2013 (n=1302) | India                        | Multicentre, prospective cohort study                               | In-hospital/admissions with influenza<br>Median age (years): 26 (1 to 82)                                                                            | 70                                   | 210        | Multiple logistic regression analysis        | Mortality                                              |
| Boudreault 2011 (n=143)       | USA                          | Single-centre, retrospective cohort                                 | Non-ICU/HCT recipients with RTI<br>Median age (years): no CS 42 (32 to 51); low-dose CS 42 (28 to 53); high-dose CS 40 (32 to 54)                    | 80<br>(low-dose 43 and high-dose 37) | 63         | Cox proportional hazards analysis            | MV, time to death                                      |
| Brun-Buisson 2011 (n=208)     | France                       | Multicentre, retrospective analysis of prospectively collected data | ICU/severe respiratory failure (ARDS or MV)<br>Median age (years): no CS 45 (35 to 55); CS 49 (34 to 56)<br>Immunosuppression: no CS 18.4%; CS 21.7% | 83 (early CS 50 and late CS 33)      | 125        | Cox proportional hazards regression analysis | Hospital mortality, length of ICU stay, adverse events |
| Cao 2016 (n=288)              | China                        | Multicentre, retrospective cohort study                             | In-hospital patients $\geq 14$ years with pneumonia<br>Median age (years): 58 (IQR 45 to 68)                                                         | 204                                  | 84         | Cox proportional hazards regression analysis | Mortality, adverse events, viral shedding              |
| Chawla 2013 (n=77)            | India                        | Single-centre, retrospective                                        | ICU/admissions with influenza<br>Mean age (years): 40.9 ( $\pm$ 13.4)                                                                                | 38                                   | 39         | NA                                           | Mortality                                              |

|                                                 |                     |                                           |                                                                                                                                                                                                                                                                                                   |                                 |     |                                              |                                                         |  |
|-------------------------------------------------|---------------------|-------------------------------------------|---------------------------------------------------------------------------------------------------------------------------------------------------------------------------------------------------------------------------------------------------------------------------------------------------|---------------------------------|-----|----------------------------------------------|---------------------------------------------------------|--|
|                                                 |                     |                                           | cohort study                                                                                                                                                                                                                                                                                      |                                 |     |                                              |                                                         |  |
| Delaney 2016<br>(n=607)                         | Canada              | Multicentre, prospective cohort study     | ICU/age ≥ 18 years; critically ill with confirmed, probable or highly suspected influenza<br>Mean age (years): no CS 46.2 (± 15.2); CS 48.8 (± 15.3)<br>Asthma: CS 29.3%; no CS 12.8%; P = < 0.001<br>COPD: CS 25.0%; no CS 9.2%; P = < 0.001<br>Immunosuppressed: CS 8.9%; no CS 3.1%; P = 0.002 | 280                             | 327 | Multivariable logistic regression analysis   | Mortality, hospital-acquired infections                 |  |
| Delgado-Rodriguez 2012<br>(n=813)               | Spain               | Multicentre, prospective cohort           | In-hospital/ILI, RTI, septic shock, multi-organ failure<br>Cohort median age (years): 41 (19 to 55)                                                                                                                                                                                               | 31                              | 782 | Multivariate logistic regression analysis    | Poor outcome (ICU admission and in-hospital death), LOS |  |
| Han 2011<br>(n=83)                              | China-Shenyang City | Multicentre, retrospective cohort         | In-hospital/age > 3 years<br>Median age (years): no CS 38 (5 to 75); CS 43 (3 to 70)                                                                                                                                                                                                              | 46 (early CS 17 and late CS 29) | 37  | Cox proportional hazards regression analysis | Critical illness                                        |  |
| Huang 2017<br>(n=86)                            | Taiwan              | Single-centre, retrospective cohort study | In-hospital/ age > 18 years<br>Cohort mean age (years): 65.9 (± 19.2)<br><br>Chronic pulmonary disease: respiratory distress cohort 27.1%                                                                                                                                                         | 29                              | 19  | Multivariable Logistic regression analysis   | Mortality                                               |  |
| Jain 2009<br>(n=272, CS data available for 239) | USA                 | Multicentre, retrospective cohort         | In-hospital/ILI with hospital admission ≥ 24 hours<br>Cohort median age: 21 years (21 days to 86 years)<br><br>Asthma: 28%; COPD: 8% Immunosuppression: 15%                                                                                                                                       | 86                              | 153 | NA                                           | Death/ICU admission versus survival/no ICU admission    |  |
| Kim 2011<br>(n=245)                             | South Korea         | Multicentre, retrospective                | ICU/age ≥ 15 years; presence of critical illness                                                                                                                                                                                                                                                  | 107                             | 138 | Multivariable Logistic regression analysis   | Mortality (14-day, 30-day and 90-day), LOS, acquired    |  |

|                     |                      |                                                                     |                                                                                                                                         |     |      |                                   |  |                                          |
|---------------------|----------------------|---------------------------------------------------------------------|-----------------------------------------------------------------------------------------------------------------------------------------|-----|------|-----------------------------------|--|------------------------------------------|
|                     |                      | cohort/case-control                                                 | Mean age (years): no CS 54.1 ( $\pm$ 19.3); CS 56.9 ( $\pm$ 17.2)                                                                       |     |      |                                   |  | infections                               |
|                     |                      |                                                                     | Asthma: CS 9%; no CS 7%                                                                                                                 |     |      |                                   |  |                                          |
|                     |                      |                                                                     | COPD: CS 13%; no CS 4%                                                                                                                  |     |      |                                   |  |                                          |
| Kinikar 2012 (n=92) | India                | Single centre, retrospective cohort study                           | ICU/admissions with influenza < 12 years<br>Cohort median age (years): 2.5 (1.3 to 6)<br>Asthma: 4.3%<br>Congenital heart disease: 6.5% | 21  | 71   | NA                                |  | In-hospital mortality                    |
| Kudo 2012 (n=89)    | Japan                | Single-centre, retrospective cohort                                 | In-hospital/hospitalised patients with respiratory disorders<br>Cohort median age (years): 8 (0 to 71)<br>Asthma: 29.2%                 | 46  | 12   | NA                                |  | LOS                                      |
| Lee 2015 (n=2649)   | China                | Multicentre, retrospective analysis of prospectively collected data | In-hospital/age > 17 years<br>Cohort median age (years): 63 (42 to 79)                                                                  | 610 | 2039 | Multivariable regression analysis |  | Mortality, bacterial superinfection, LOS |
| Li 2012 (n=46)      | China-Anhui province | Multicentre, retrospective cohort study                             | In-hospital/pregnant, severe disease<br>Median age (years): adults who died 21 (18 to 31) and survivors 21 (18 to 27)                   | 27  | 19   | NA                                |  | Mortality                                |

|                       |              |                                                                     |                                                                                                                                                                                                                                            |      |      |                                              |                                                           |
|-----------------------|--------------|---------------------------------------------------------------------|--------------------------------------------------------------------------------------------------------------------------------------------------------------------------------------------------------------------------------------------|------|------|----------------------------------------------|-----------------------------------------------------------|
| Li 2017<br>(n=2141)   | China        | Multicentre, retrospective analysis of prospectively collected data | In-hospital with viral pneumonia > 14 years<br><br>Median age (years): no CS 33.7 (24.6 to 48.7); CS 35.0 (23.8 to 52.4)<br><br>Asthma: no CS 1.5%; CS 2.1%<br><br>COPD: no CS 4.3%; CS 5.6%<br><br>Immunosuppression: no CS 1.4%; CS 3.2% | 1055 | 1086 | Cox proportional hazards regression analysis | Mortality, ICU admission, hospital-acquired infection, MV |
| Liem 2009<br>(n=67)   | Vietnam      | Multicentre, retrospective cohort                                   | In-hospital/hospitalised patients with influenza<br>Cohort median age (years): 25 (16 to 42)                                                                                                                                               | 29   | 38   | NA                                           | In-hospital mortality                                     |
| Linko 2011<br>(n=132) | Finland      | Multicentre, prospective cohort study                               | ICU/admissions with influenza<br><br>Median age (years): no CS 44 (25 to 57); CS 51 (40 to 56)<br><br>COPD: no CS 5%; CS 8%<br><br>Other obstructive pulmonary disease: no CS 23%; CS 21%                                                  | 72   | 60   | Multivariable logistic regression analysis   | In-hospital mortality, MV, LOS                            |
| Mady 2012<br>(86)     | Saudi Arabia | Single-centre, retrospective cohort study                           | ICU/influenza with respiratory failure<br><br>Cohort mean age (years): 40.8<br><br>Asthma or COPD: 38.3%                                                                                                                                   | 43   | 43   | NA                                           | Mortality                                                 |

|                                 |               |                                           |                                                                                                                                                                                                                                                                                                               |     |       |                                              |                         |
|---------------------------------|---------------|-------------------------------------------|---------------------------------------------------------------------------------------------------------------------------------------------------------------------------------------------------------------------------------------------------------------------------------------------------------------|-----|-------|----------------------------------------------|-------------------------|
| Moreno 2018<br>(n=1846)         | Spain         | Multicentre, prospective cohort study     | ICU/viral pneumonia<br>Median age (years): CS 53 (41 to 62); no CS 51 (39 to 61)                                                                                                                                                                                                                              | 604 | 1242  | Cox proportional hazards regression analysis | ICU mortality           |
| Ono 2016<br>(n=88054)           | Japan         | Multicentre retrospective cohort study    | Medical insurance database, < 65 years, first episode of hospitalisation with confirmed influenza<br><br>All < 65 years.<br><br>Asthma: hospitalised 39.5%; non-hospitalised 23.5%<br><br>COPD: hospitalised 2.9%; non-hospitalised 0.5%<br><br>Immunosuppression: hospitalised 0.36%; non-hospitalised 0.13% | 804 | 87250 | Cox proportional hazards regression analysis | Rate of hospitalisation |
| Patel 2013<br>(n=63)            | India-Gujarat | Single-centre, retrospective cohort study | In-hospital/admissions with influenza<br>Cohort median age (years): 34 (3 to 69)                                                                                                                                                                                                                              | 39  | 24    | NA                                           | Mortality               |
| Sertogullarindan 2011<br>(n=20) | Turkey        | Single-centre, prospective cohort study   | ICU/severe community-acquired pneumonia and influenza<br><br>Cohort median age (years): 36 (15 to 72)<br><br>COPD: 10%                                                                                                                                                                                        | 7   | 13    | NA                                           | Mortality               |
| Sheu 2017<br>(n=192)            | Taiwan        | Multicentre, retrospective cohort study   | ICU admissions with confirmed influenza<br>Cohort mean age (years): 58.3                                                                                                                                                                                                                                      | 101 | 91    | NA                                           | Mortality               |



|                        |               |                                                                                              |                                                                                                                                                                                                       |    |     |                                            |                                                                                                                                               |
|------------------------|---------------|----------------------------------------------------------------------------------------------|-------------------------------------------------------------------------------------------------------------------------------------------------------------------------------------------------------|----|-----|--------------------------------------------|-----------------------------------------------------------------------------------------------------------------------------------------------|
| Viasus 2011<br>(n=197) | Spain         | Multicentre, prospective cohort study                                                        | In-hospital/ non-immunosuppressed, admitted > 24 hours<br>Median age (years): no CS 35 (28 to 47); CS 44 (36 to 53)<br>Chronic pulmonary disease: no CS 17.1%; CS 45.9%                               | 37 | 129 | NA                                         | Severe disease<br><br>(composite outcome of ICU admission/death), acquired infection                                                          |
| Wirz 2016<br>(n=785)   | Switzerland   | Multicentre RCT of adjunct prednisone therapy versus placebo in community-acquired pneumonia | Non-ICU with community-acquired pneumonia (influenza subgroup n = 24)<br>All trial participants: mean age (years): CS arm 70.3 (± 17.5); placebo arm 69.0 (± 17)<br>COPD: CS arm 19.3%; placebo 15.4% | 11 | 13  |                                            | Any-cause mortality at 30 d, hospital readmission at 30 days post discharge, time to effective hospital discharge, time to clinical stability |
| Wu 2012<br>(n=206)     | Taiwan        | Single-centre, prospective cohort                                                            | Mixed cohort of out-patients and in-patients<br>Age >= 65 years in cohort: 12.6%<br>Chronic lung disease: 9.7%<br>Malignancy: 8.7%                                                                    | 17 | 189 | Multivariable logistic regression analysis | Complicated influenza (requiring hospitalisation)                                                                                             |
| Xi 2010<br>(n=155)     | China-Beijing | Multicentre, retrospective                                                                   | In-hospital/age ≥ 18 years                                                                                                                                                                            | 52 | 103 | Multivariable logistic regression analysis | In-hospital mortality<br><br>Subgroup analysis of                                                                                             |

|                      |                     |                                               |                                                                               |                                                     |                                                      |                                      |          |                       |                      |
|----------------------|---------------------|-----------------------------------------------|-------------------------------------------------------------------------------|-----------------------------------------------------|------------------------------------------------------|--------------------------------------|----------|-----------------------|----------------------|
|                      |                     | cohort study                                  | Cohort mean age (years): 43 ( $\pm$ 18.6)                                     |                                                     |                                                      |                                      |          |                       | mortality by CS dose |
|                      |                     |                                               | COPD: 6.5%                                                                    |                                                     |                                                      |                                      |          |                       |                      |
| Yu 2011<br>(n=128)   | China-<br>Zhengzhou | Multicentre,<br>retrospective<br>cohort study | Not defined                                                                   | 54                                                  | 74                                                   | Multivariable<br>regression analysis | logistic | Mortality             |                      |
|                      |                     |                                               | Cohort mean age (years): females 28.5 ( $\pm$ 16.4); males 28.5 ( $\pm$ 20.4) |                                                     |                                                      |                                      |          |                       |                      |
|                      |                     |                                               | Range 8 months to 79 years                                                    |                                                     |                                                      |                                      |          |                       |                      |
| Tsai 2020<br>(n=241) | Taiwan              | Multicentre<br>prospective<br>cohort          | ICU/Influenza with ARDS                                                       | Not reported<br>(85 for<br>sensitivity<br>analysis) | Not reported<br>(156 for<br>sensitivity<br>analysis) | Multivariable<br>regression analysis | logistic | Mortality, bacteremia |                      |
|                      |                     |                                               | Cohort median age 60 (51 to 66)                                               |                                                     |                                                      |                                      |          |                       |                      |
|                      |                     |                                               | 63.5% male                                                                    |                                                     |                                                      |                                      |          |                       |                      |
|                      |                     |                                               | Malignancy 12%, diabetes 28.6%                                                |                                                     |                                                      |                                      |          |                       |                      |

ARDS=acute respiratory distress syndrome; CS=corticosteroid; HCT=hematopoietic cell transplant; ICU=intensive care unit; IQR=interquartile range; LOS=length of stay; MV=mechanical ventilation; PVS=prolonged viral shedding; RTI=respiratory tract infection.

**Table 7 Characteristics of included randomized controlled trials for CAP**

| <b>Study/year<br/>(country)<br/>(reference)</b> | <b>Setting/<br/>inclusion criteria</b>                                                                                                                                                      | <b>Patient<br/>characteristics</b>                             | <b>Disease<br/>severity<br/>scores</b> | <b>CS<br/>Group<br/>N</b> | <b>Non-<br/>CS<br/>group<br/>N</b> | <b>Corticosteroid therapy dose<br/>/timing/duration</b>                                                                 | <b>Outcomes reported</b>                                      |
|-------------------------------------------------|---------------------------------------------------------------------------------------------------------------------------------------------------------------------------------------------|----------------------------------------------------------------|----------------------------------------|---------------------------|------------------------------------|-------------------------------------------------------------------------------------------------------------------------|---------------------------------------------------------------|
| Wagner,<br>1956<br>(US)                         | Not specified<br><br>Culture-confirmed pneumococcal pneumonia                                                                                                                               | Not specified                                                  | Not specified                          | 52                        | 61                                 | Hydrocortisone 80–100 mg oral every 6 h tapering dose over 5 days.                                                      | Mortality                                                     |
| McHardy,<br>1972<br>(Australia)                 | City Hospital, Edinburgh<br><br>Age ≥12 y, clinical diagnosis of pneumonia                                                                                                                  | Inpatient adults and children (aged > 12 years) with pneumonia | Severe (physician judgment), 20/126    | 40                        | 86                                 | Prednisolone 20 mg daily for 7 days                                                                                     | Mortality                                                     |
| Marik,<br>1993<br>(South africa)                | ICU of Baragwanath Hospital and Department of Clinical and Experimental Pharmacology (Dr. Havlik),<br>University of the Witwatersrand<br><br>Age ≥18 and ≤70 y, BTS criteria for severe CAP | Inpatient adults with severe CAP                               | APACHE II and Lung Injury Score        | 14                        | 16                                 | Hydrocortisone dose IV 10 mg/kg, 30 minutes prior to starting antibiotic therapy, 1 dose; during hospitalisation in ICU | Mortality<br>Length of ICU<br>Need for mechanical ventilation |
| Confalonieri,<br>2005<br>(Italy)                | ICU or f Respiratory Intermediate Unit (RICU) Ospedale di Trieste, Ospedale Gradenigo (Torino), Ospedale Molinette (Torino),                                                                | Inpatient adults with severe community-                        | American Thoracic                      | 23                        | 23                                 | Hydrocortisone IV 200 mg loading bolus followed by an infusion (hydrocortisone 240 mg in 500                            | Mortality<br>Length of ICU<br>Length of hospital stay         |

Arcispedale S. Anna (Ferrara), Ospedale di Crema, or Ospedale di Paderno Dugnano (Milano).

CAP with 1993 ATS criteria severe; Major criteria included (1) requirement of mechanical ventilation; (2) increase in the size of opacities on chest radiograph of 50% or more at 48 hours; (3) requirement of vasopressors for more than 4 hours; or (4) serum creatinine 2 or more mg/dl.

acquired pneumonia

Society criterion for severe pneumonia

cmh 0.9% saline) at a rate of 10 mg/hour; duration 7ds

Need for mechanical ventilation  
Duration of mechanical ventilation  
Gastrointestinal bleeding  
Superinfection

|                                  |                                                                               |                                   |          |    |    |                                                                                                                        |                                                                                                                                              |
|----------------------------------|-------------------------------------------------------------------------------|-----------------------------------|----------|----|----|------------------------------------------------------------------------------------------------------------------------|----------------------------------------------------------------------------------------------------------------------------------------------|
| El-Ghamrawy, 2006 (Saudi Arabia) | Not reported<br>Age ≥18 y, severe CAP by ATS criteria requiring ICU admission | Age ≥18 years old with severe CAP | ATS 2001 | 17 | 17 | Hydrocortisone IV 200 mg bolus followed by maintenance IV dose 240 mg in 500 mL 0.9% saline at a rate of 10 mg/kg/hour | Mortality<br>Length ICU stay<br>Length of hospital stay<br>Duration of mechanical ventilation<br>Gastrointestinal bleeding<br>Superinfection |
| Mikami, 2007 (Japan)             | Kanto Central Hospital (community general hospital),                          | Inpatient adults with community-  | PORT     | 15 | 16 | Prednisolone IV 40 mg x 1/d; duration 3 days                                                                           | Length of hospital stay<br>Serious hyperglycemia.<br>Neuropsychiatric events                                                                 |

|                                 | Any CAP, non-severe by ATS criteria                                                                                                                                                              | acquired pneumonia               |                          |     |     |                                                                                                     | Superinfection                                                                                             |
|---------------------------------|--------------------------------------------------------------------------------------------------------------------------------------------------------------------------------------------------|----------------------------------|--------------------------|-----|-----|-----------------------------------------------------------------------------------------------------|------------------------------------------------------------------------------------------------------------|
| Snijders, 2010 (Netherlands)    | Medical Centre Alkmaar, a 900-bed teaching hospital<br><br>Age ≥18 y hospitalized with CAP                                                                                                       | Inpatient adults with CAP        | Pneumonia Severity Index | 104 | 109 | Prednisolone IV or PO 40 mg x 1/d; duration 7 days                                                  | Mortality<br>Length of hospital stay<br>Serious hyperglycemia<br>Neuropsychiatric events<br>Superinfection |
| Fernández-Serrano, 2011 (Spain) | Hospital Universitari de Bellvitge, a 900-bed hospital in Barcelona, Spain<br><br>Age ≥18 and ≤75 y, severe CAP with consolidation of ≥ 2 lobes and Po <sub>2</sub> /Fio <sub>2</sub> < 300 mmHg | Inpatient adults with CAP        | Fine Score               | 23  | 22  | Methylprednisolone IV 200 mg bolus followed by maintenance IV dose (20 mg/6 hour); duration 10 days | Mortality                                                                                                  |
| Meijvis, 2011 (Netherlands)     | 2 centers; 880-bed St Antonius Hospital in Nieuwegein and the 00-bed Gelderse Vallei Hospital in Ede in the Netherlands<br><br>Age ≥18 y, CAP by PSI criteria                                    | Inpatient adults with CAP        | Pneumonia severity index | 151 | 153 | Dexamethasone IV 5 mg x 1/d; duration 4 days                                                        | Mortality<br>Length ICU stay<br>Length of hospital stay<br>Serious hyperglycemia<br>Superinfection         |
| Sabry, 2011 (Egypt)             | 3 centers; Cairo University, and the National Institute of Chest Diseases, and Intensive Care Unit of Ain-Shams Hospital, Ain-Shams University.<br><br>Adults with ATS criteria for severe CAP   | Inpatient adults with severe CAP | ATS 1998                 | 40  | 40  | Hydrocortisone IV (loading dose of 200 mg, followed by 12.5 mg/h); duration 7 days.                 | Mortality<br>Duration of mechanical ventilation<br>Gastrointestinal bleeding                               |

|                                                                                                                                                                                                                                                                                                                                                                                                                                                  |                                                                                                                                                                                                                                                                 |                                                    |                          |     |     |                                                                                               |                                                                                                                                                                                        |
|--------------------------------------------------------------------------------------------------------------------------------------------------------------------------------------------------------------------------------------------------------------------------------------------------------------------------------------------------------------------------------------------------------------------------------------------------|-----------------------------------------------------------------------------------------------------------------------------------------------------------------------------------------------------------------------------------------------------------------|----------------------------------------------------|--------------------------|-----|-----|-----------------------------------------------------------------------------------------------|----------------------------------------------------------------------------------------------------------------------------------------------------------------------------------------|
| Nafae,<br>2013<br>(Egypt)                                                                                                                                                                                                                                                                                                                                                                                                                        | Chest Department, Respiratory Intensive Care Unit, General Medicine Department and General Medicine Intensive Care Unit of the Zagazig University Hospitals                                                                                                     | Inpatient adults with community-acquired pneumonia | Pneumonia Severity Index | 60  | 20  | Hydrocortisone IV 200 mg bolus followed by maintenance IV dose of 10 mg/hour; duration 7 days | Mortality<br>Length ICU stay<br>Length of hospital stay<br>Need for mechanical ventilation<br>Duration of mechanical ventilation<br>Serious hyperglycemia<br>Gastrointestinal bleeding |
| Age $\geq 18$ y, Patients with clinical and radiographic evidence of CAP (pneumonia diagnosed by clinical signs and symptoms: cough with or without sputum, fever $> 38.5$ , dyspnea, pleuritic chest pain or abnormal breath sounds, and radiographic pulmonary abnormalities that are at least segmental and are not due to preexisting or other known causes) which was acquired at the community or within the first 48 h of hospitalization |                                                                                                                                                                                                                                                                 |                                                    |                          |     |     |                                                                                               |                                                                                                                                                                                        |
| Blum,<br>2015<br>(Switzerland)                                                                                                                                                                                                                                                                                                                                                                                                                   | 7 centers<br><br>Age $\geq 18$ y, hospital admission with CAP defined by a new infiltrate on chest radiograph and the presence of at least one of the following acute respiratory signs and symptoms: cough, sputum production, dyspnoea, core body temperature | Inpatient adults with CAP                          | Pneumonia Severity Index | 392 | 393 | Prednisone PO 50 mg x 1/d; duration 7 days                                                    | Mortality<br>Length ICU stay<br>Length of hospital stay<br>Need for mechanical ventilation<br>Serious hyperglycemia<br>Gastrointestinal bleeding                                       |

of 38.0°C or higher, auscultatory findings of abnormal breathing sounds or rales, leucocyte count higher than 10 000 cells per  $\mu$ L or less than 4000 cells per  $\mu$ L.<sup>15</sup>

Neuropsychiatric events  
Superinfection

|                      |                                                                                                              |                                                   |                                                                       |    |    |                                                                                            |                                                                                                                                                                                               |
|----------------------|--------------------------------------------------------------------------------------------------------------|---------------------------------------------------|-----------------------------------------------------------------------|----|----|--------------------------------------------------------------------------------------------|-----------------------------------------------------------------------------------------------------------------------------------------------------------------------------------------------|
| Torres, 2015 (Spain) | 3 centers<br><br>Age $\geq$ 18 y with severe CAP by ATS or PSI criteria and serum CRP level >150 mg/L        | Inpatient adults with CAP                         | PSI, AST                                                              | 61 | 59 | Methylprednisolone IV 0.5 mg/kg in bolus x 2/d; 5 days                                     | Mortality<br>Length ICU stay<br>Length of hospital stay<br>Need for mechanical ventilation<br>Serious hyperglycemia<br>Gastrointestinal bleeding<br>Neuropsychiatric events<br>Superinfection |
| Gang, 2016 (China)   | China-Japan Friendship Hospital<br><br>Criteria of Respiratory Disease Branch of Chinese medical association | Inpatient adults with severe CAP and Septic shock | Criteria of Respiratory Disease Branch of Chinese medical association | 29 | 29 | Methylprednisolone sodium succinate 80 mg daily, duration 7 days; plus Antibacterial drugs | Mortality<br>Length of hospital stay<br>Duration of mechanical ventilation<br>Serious hyperglycemia                                                                                           |

CS=Corticosteroid; CAP=Community acquired pneumonia; ATS=American Thoracic Society; BTS=British Thoracic Society; PSI=Pneumonia Severity Index; PO=Oral administration; CRP=C-Reactive protein; IV=Intravenous.
